# Supplementary material for: Exosomal circEZH2_005, an intestinal injury biomarker, alleviates intestinal ischemia/reperfusion injury by mediating hnRNPA1/Gprc5a signaling
Source: Research Square preprint supplement (doi:10.21203/rs.3.rs-2404504/v1), 2023-01-13
Supplement: Supplementary file 1 [file 45a579719f9be9db17eb1b12.pdf]

1  
2  
3  
4                   Supplementary Materials for

5  
6       **Exosomal circEZH2\_005, an intestinal injury biomarker, alleviates intestinal**  
7       **ischemia/reperfusion injury by mediating hnRNPA1/Gprc5a signaling**  
8

9       Wenjuan Zhang#, Bowei Zhou#, Xiao Yang, Jin Zhao, Jingjuan Hu, Yuqi Ding, Shuteng Zhan,  
10       Yifeng Yang, Jun Chen, Fu Zhang, Bingcheng Zhao, Fan Deng, Zebin Lin, Qishun Sun,  
11       Fangling Zhang, Zhiwen Yao, Weifeng Liu, Cai Li\* and Ke Xuan Liu\*

12  
13                   \*Corresponding author. Email:liukexuan705@163.com; licaisysu@163.com.  
14  
15  
16  
17  
18

19       **This PDF file includes:**

20  
21               Figs. S1 to S9  
22               Tables S1 to S4  
23  
24  
25  
26

## 27 Supplementary Figures

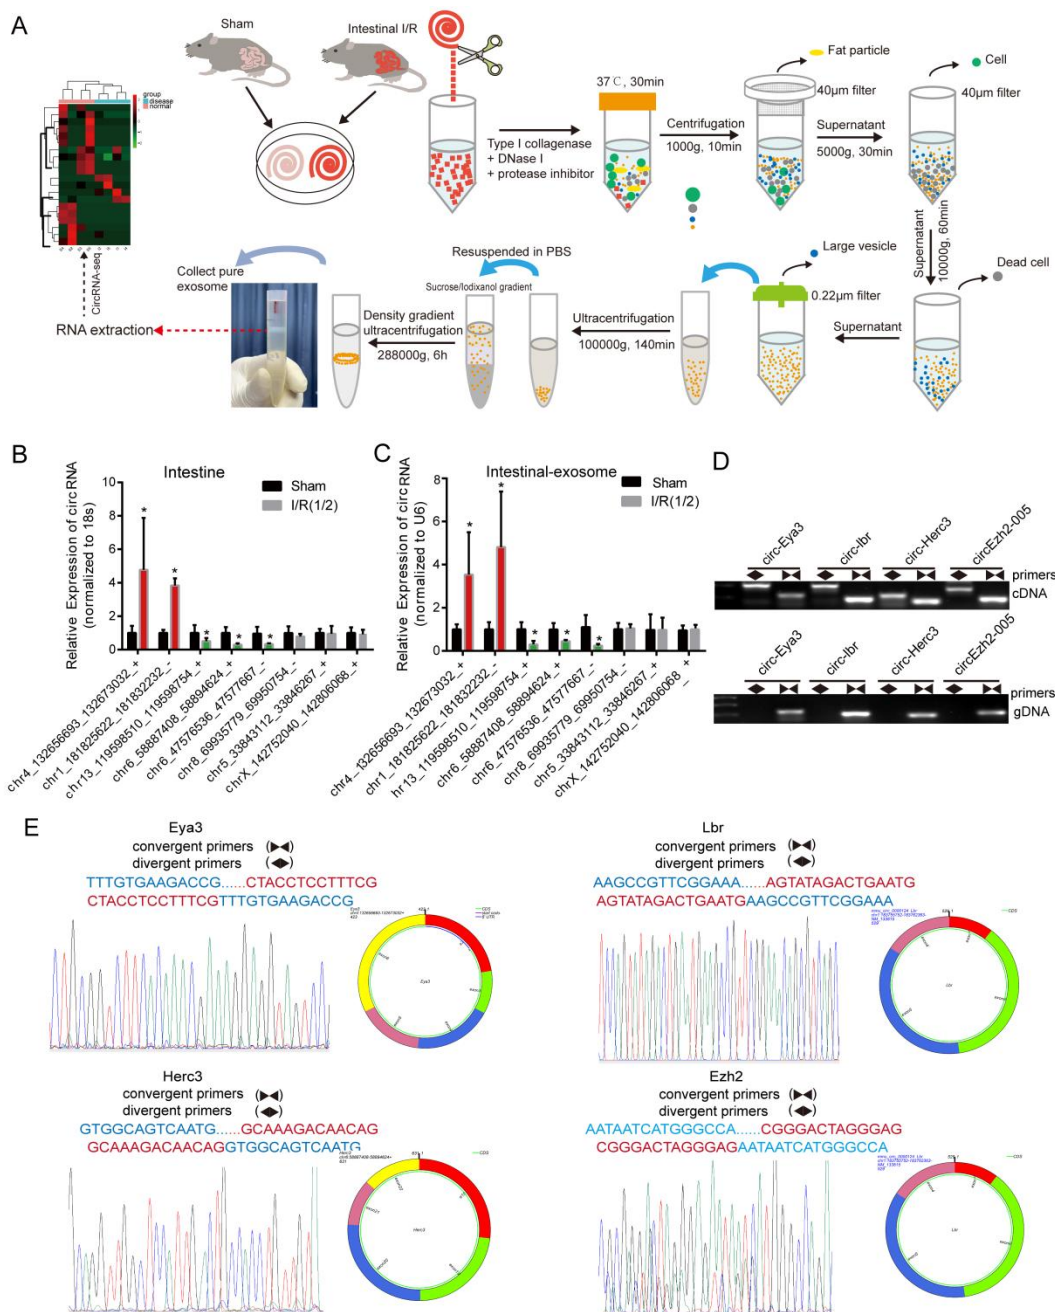

**Fig. S1. Identification of the top four differentially expressed circRNAs.** (A) The experimental scheme of exosome extraction from intestinal tissue. (B, C) RT-qPCR assay to illustrate the accuracy of circRNA-seq data from exosomes and confirmation of the eight highly expressed circRNAs. Data were presented as means  $\pm$  SEM,  $n=5$ . (D) The amplification of circRNAs from cDNA or genomic DNA (gDNA) with divergent and convergent primers was shown by PCR. (E) Schematic illustration illustrating the generation of the top four putative target circRNAs from its host gene, then validated by Sanger sequencing.

37  
38

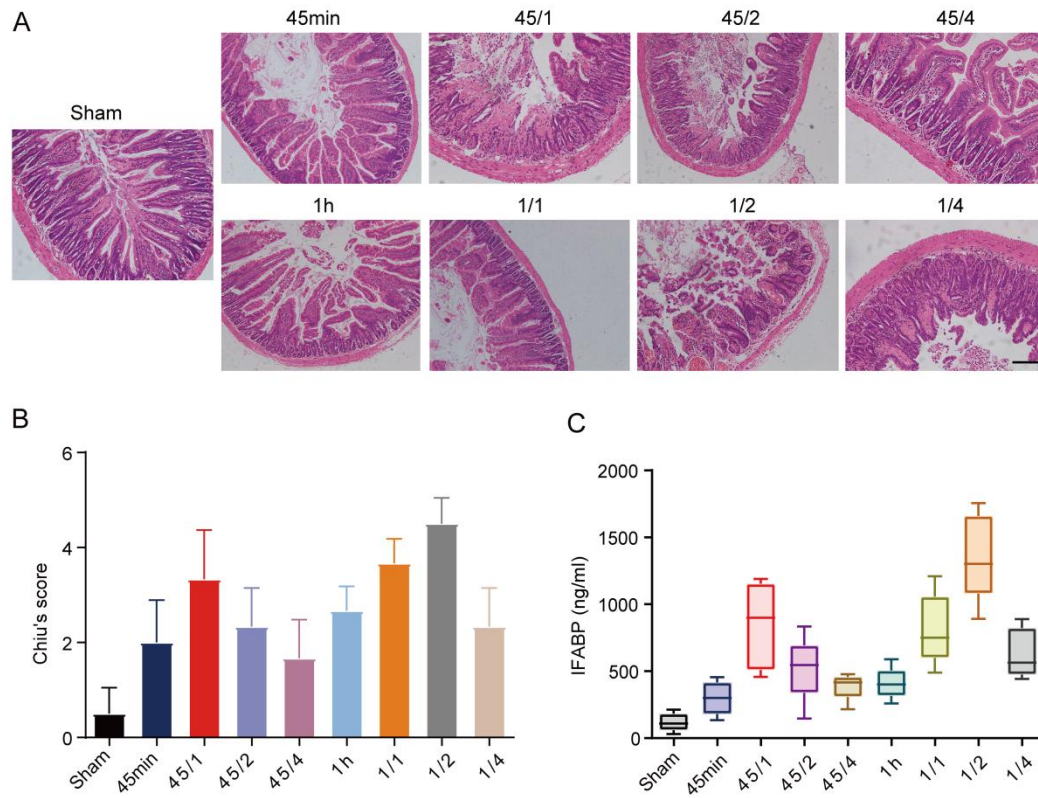

39  
40  
41  
42  
43  
44  
45  
46  
47

**Fig. S2. Intestinal I/R model mice were established at different time points.** (A) Mice were subjected to intestinal I/R mode and underwent different time points of ischemia (45 min and 1h of ischemia) and different time points of reperfusion (1h, 2h, and 4h of reperfusion), the histopathological was estimated by the H&E staining (n = 6). (B) Chui's score was used to assess the intestinal injury. (C) The ischemia-reperfusion-induced intestinal damage was evaluated by the serum I-FABP levels (n = 6). The data were analyzed by one-way ANOVA (Tukey's test) and presented as mean  $\pm$  SEM. (\* p < 0.05, \*\* p < 0.01, \*\*\* p < 0.001).

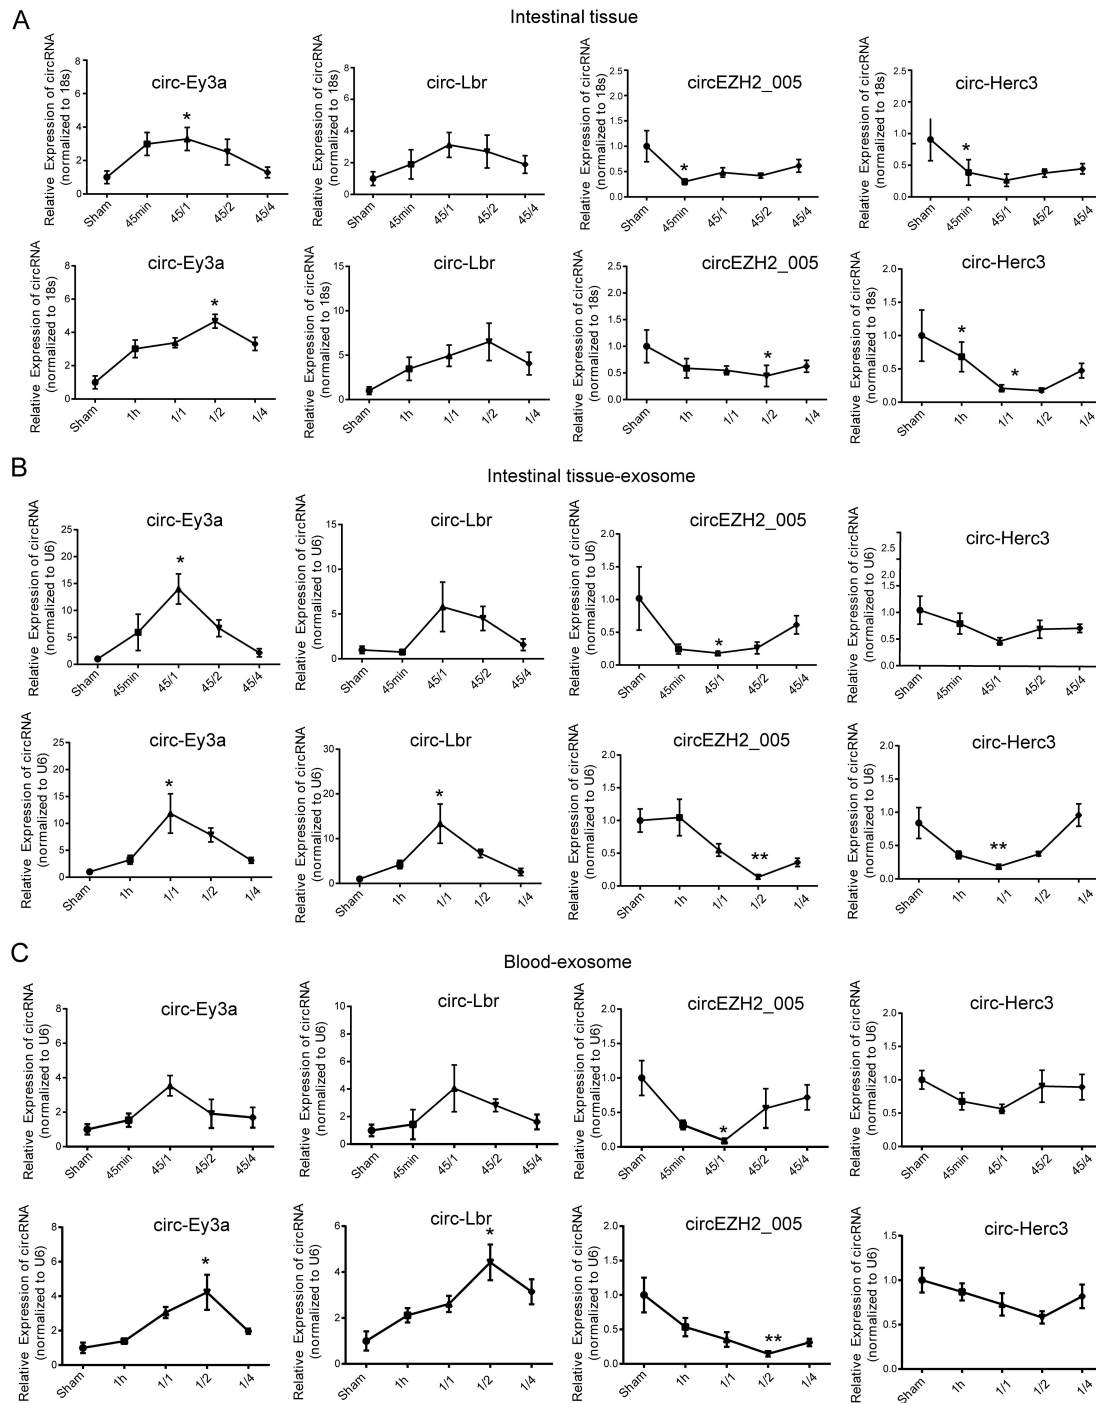

**Fig. S3. The expression of the top four differentially expressed circRNAs.** (A) RT-qPCR for the expression of the top four differentially expressed circRNAs in intestinal tissues at different time points of intestinal I/R mice mode. (B) Expression of the top four differentially expressed circRNAs in intestinal tissue exosomes at different time points of intestinal I/R mice mode. (C) Expression of the top four differentially expressed circRNAs in plasma exosomes at different time points of intestinal I/R mice mode. The data were analyzed by one-way ANOVA (Tukey's test) and presented as mean  $\pm$  SEM, n=4. (\*  $p < 0.05$ , \*\*  $p < 0.01$ ).

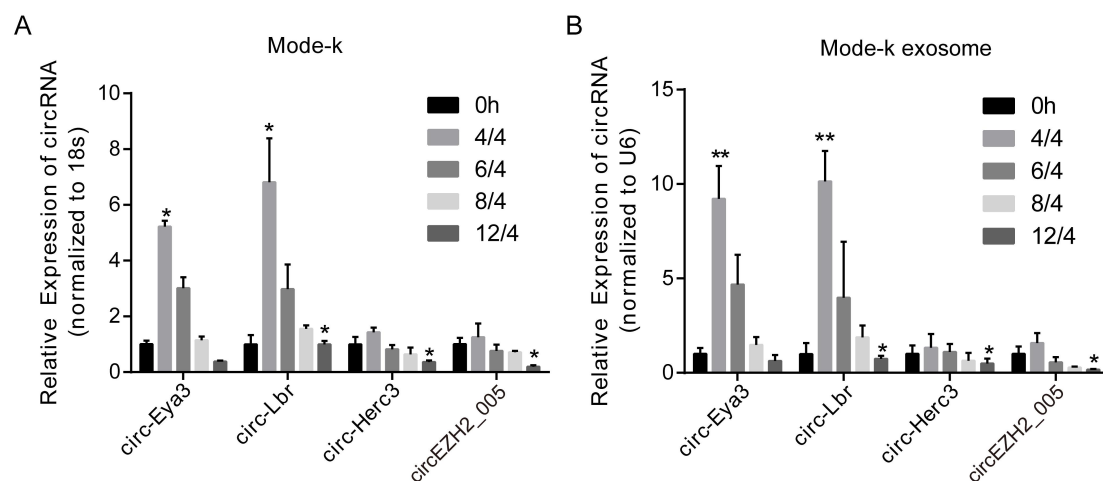

**Fig. S4. The expression of the top four differentially expressed circRNAs in cells.** RT-qPCR for the expression of the top four differentially expressed circRNAs in intestinal epithelial cell (Mode-K cell) and exosomes of cell supernatant subjected to different time points of hypoxia (4h, 6h, 8h, and 12h) and 4h of reoxygenation. The data were analyzed by one-way ANOVA (Tukey's test) and presented as mean  $\pm$  SEM, n=3. (\*P < 0.05, \*\*P < 0.01).

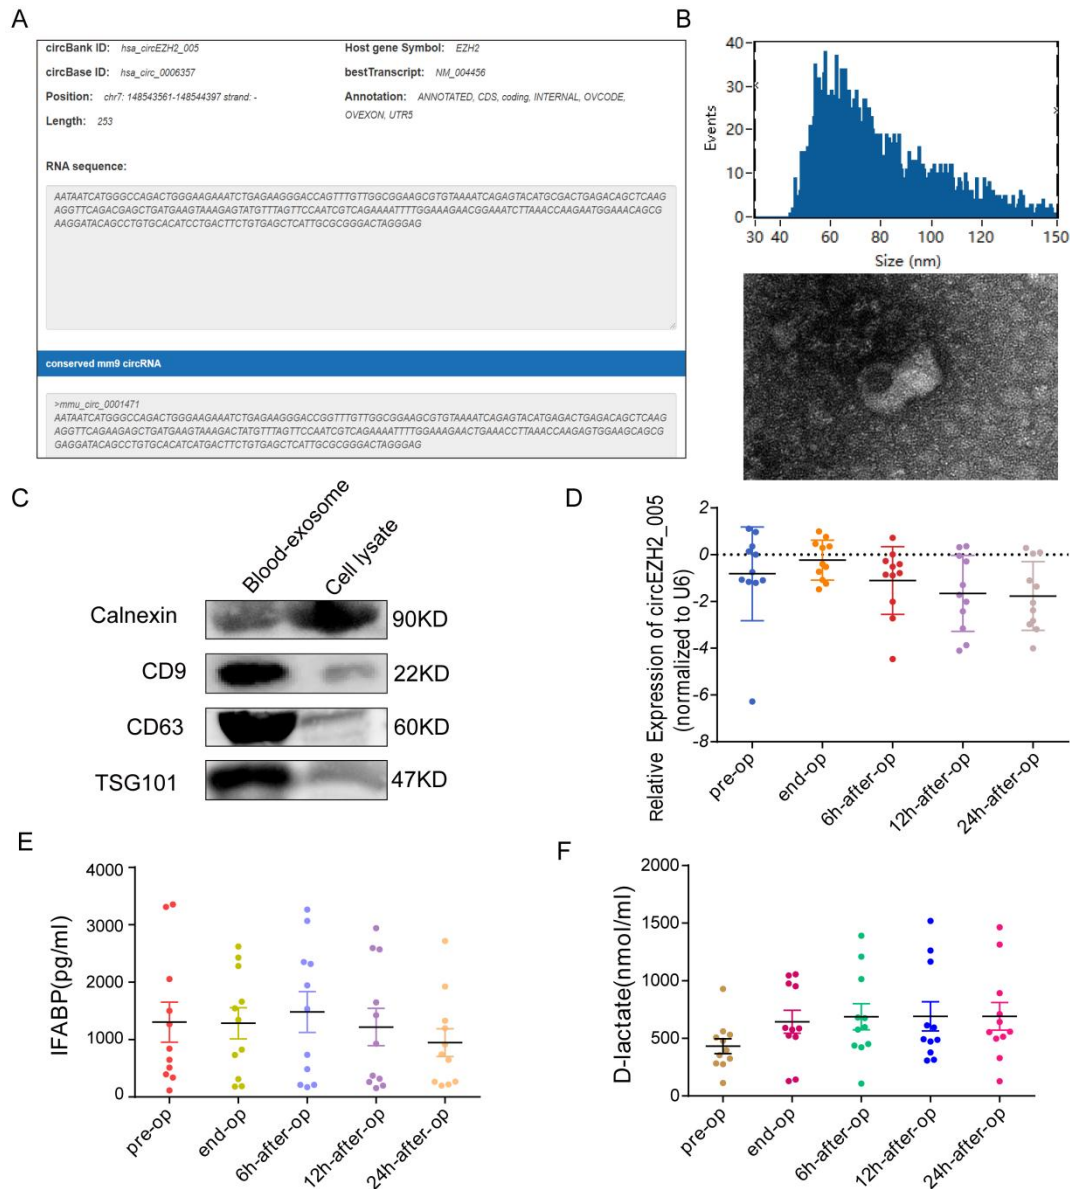

**Fig. S5. Isolating and analyzing plasma exosomes from clinical patients.** (A) Analysis of conservation of circEZH2\_005 in humans and mice using circBank database. (B) The particle size and electron micrograph of plasma exosomes extracted by commercial kit. (C) The exosome-specific markers CD9, CD63, TSG101, and Calnexin were shown by western blot. (D) RT-qPCR analysis of exosomal circEZH2\_005 expression in the plasma of patients without intestinal I/R injury in preoperative, end operative, 6 hours after operative, 12 hours after operative, and 24 hours after operative (n=11 in controls). (E, F) Plasma I-FABP and D-lactate levels were assessed by ELISA (n=11 in controls). The data were analyzed by one-way ANOVA (Tukey's test) and presented as mean  $\pm$  SEM. (\*  $p < 0.05$ , \*\*  $p < 0.01$ , \*\*\*  $p < 0.001$ ).



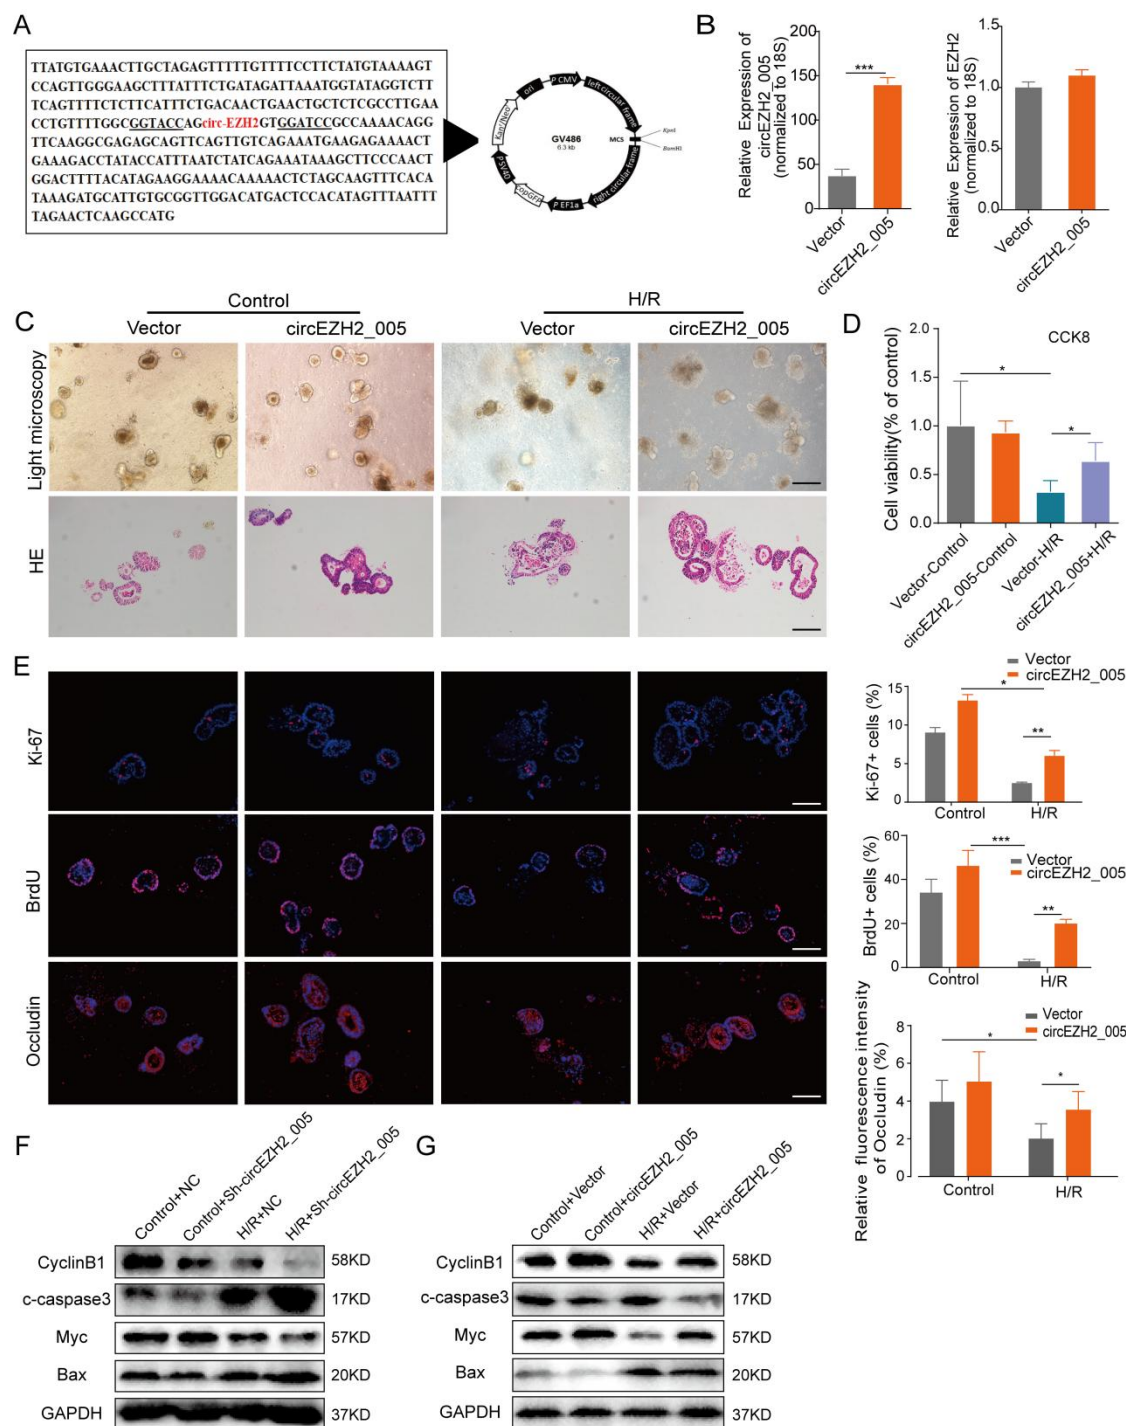

**Fig. S6. CircEZH2\_005 protects intestinal organoids from H/R injury in vitro.** (A) The overexpression sequence of circEZH2\_005 (the two end sequences of circEZH2\_005 are partial concyclic sequences) was connected to the gv486 vector to construct circEZH2\_005 overexpression plasmid, and then packaged on adenovirus vector. (B) RT-qPCR analysis of circEZH2\_005 overexpression and EZH2 expression in circEZH2\_005 -adenovirus transfected cells (n = 3). (C) Organoid morphology was observed by light microscopy and HE staining, scale bar is 100µm (n = 3). (D) The organoid viability was analyzed by CCK-8 (n = 5). (E)

Immunofluorescence staining for the Ki-67, BrdU, and occludin in the organoids for proliferation analysis, scale bar is 100 $\mu$ m (n = 3). (F) Western blot was conducted to analyze apoptotic and proliferation-related proteins induced by H/R and circEZH2\_005 interference (n = 3). (G) Western blot was conducted to analyze apoptotic and proliferation-related proteins induced by H/R and circEZH2\_005 overexpression (n = 3). The data were analyzed by the one-way ANOVA (Tukey's test) and presented as means  $\pm$  SEM. (\* p < 0.05, \*\* p < 0.01, \*\*\* p < 0.001).

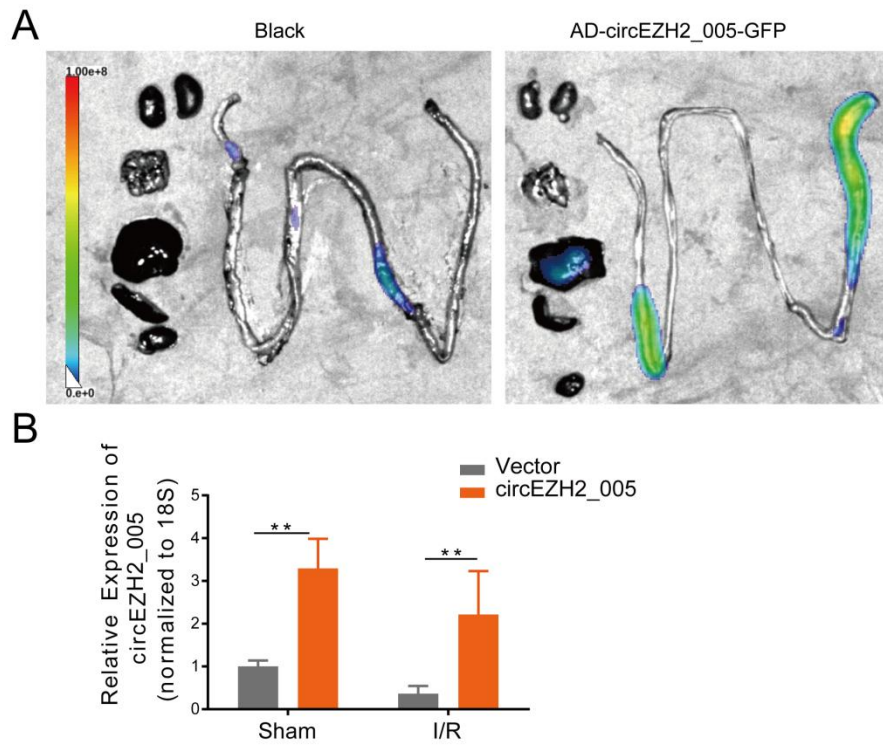

**Fig. S7. Effect of circEZH2\_005 overexpression in the mouse.** (A) Fluorescence in vivo imaging was used to detect the overexpression position of circEZH2\_005 adenovirus vector in mice after microinjecting with circEZH2\_005 adenovirus. (B) RT-qPCR analysis of circEZH2\_005 overexpression in intestinal tissues and intestinal crypt cell (n = 3). (\* p < 0.05, \*\* p < 0.01, \*\*\* p < 0.001).



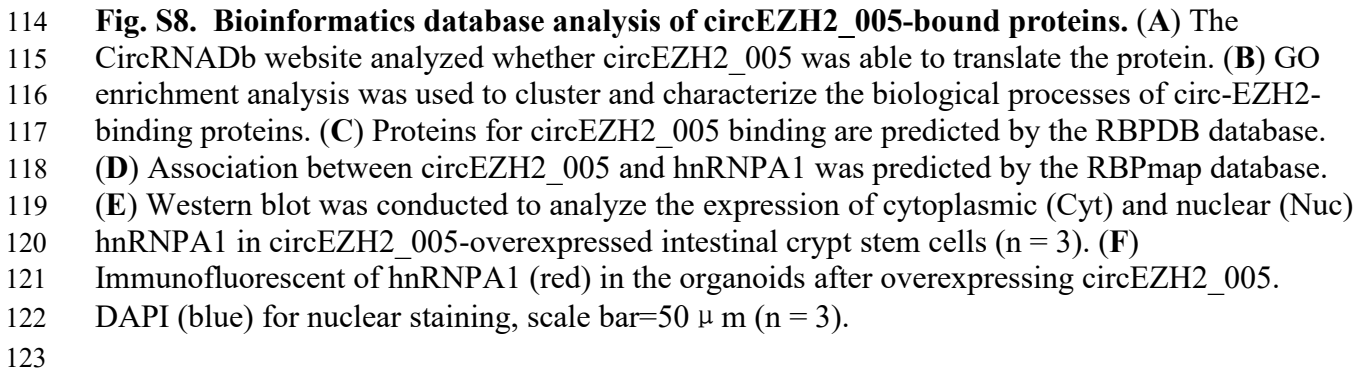



## Supplementary Tables

**Supplementary Table S1. Baseline characteristics for AGI on the first operative day**

|                                                          | Total (n=50)           | AGI < 2 (n=11)         | AGI ≥2 (n=39)          | p-Value |
|----------------------------------------------------------|------------------------|------------------------|------------------------|---------|
| Age, median (IQR)                                        | 58.0 (53.0-65.5)       | 53.0 (39.0-56.0)       | 59.0 (55.0-70.0)       | 0.011   |
| Sex, n (%)                                               |                        |                        |                        | 0.594   |
| Male                                                     | 17 (34)                | 3 (27)                 | 14 (36)                |         |
| Female                                                   | 33 (66)                | 8 (73)                 | 25 (64)                |         |
| BMI (kg/m <sup>2</sup> ), mean ± SD                      | 23.8±0.5               | 22.2±1.2               | 24.2±0.6               | 0.095   |
| ASA, n (%)                                               |                        |                        |                        | 0.737   |
| III                                                      | 44 (88)                | 10 (91)                | 34 (87)                |         |
| IV                                                       | 6 (12)                 | 1 (9)                  | 5 (13)                 |         |
| Duration of anesthesia (min), median (IQR)               | 329.0 (309.3-365.0)    | 318.0 (306.0-355.0)    | 330.0 (310.0-365.0)    | 0.482   |
| Duration of surgery (min), median (IQR)                  | 272.5 (244.5-302.0)    | 273.0 (242.0-291.0)    | 272.0 (245.0-302.0)    | 0.815   |
| CPB total time (min), median (IQR)                       | 135.0 (94.8-164.8)     | 106.0 (93.0-156.0)     | 142.0 (95.0-167.0)     | 0.426   |
| <b>Postoperative</b>                                     |                        |                        |                        |         |
| Duration of postoperative intubation (min), median (IQR) | 1227.5 (1039.3-1665.0) | 1077.0 (470.0-1270.0)  | 1245.0 (1053.0-2650.0) | 0.015   |
| Duration of postoperative fasting (min), median (IQR)    | 1622.5 (1393.8-2043.3) | 1372.0 (1260.0-1580.0) | 1732.0 (1478.0-2540.0) | 0.006   |

**Abbreviations:** IQR, interquartile range; SD, standard deviation; AGI, acute gastrointestinal injury; BMI, body mass index; ASA: American Society of Anesthesiologists physical status; CPB: cardiopulmonary bypass.

154  
155  
156

**Supplementary Table S2. The sequences of primers used for qRT-PCR**

| Gene name               | Sequence (5'-3')        |
|-------------------------|-------------------------|
| CircEZH2_005 (forward)  | TTTAGTTCCAATCGTCAG      |
| CircEZH2_005 (reverse)  | CTCAGATTCTTCCCAGT       |
| Circ-Eya3 (forward)     | ACCCAAACTTACGGACTA      |
| Circ-Eya3 (reverse)     | CTCAGGCTTCTCATCACT      |
| Circ-Lbr2 (forward)     | CTGCTCCACTTCCCTCCA      |
| Circ-Lbr2 (reverse)     | CACGCTGACGCTGTTTCC      |
| Circ-Herc3 (forward)    | ACAACAGGTGGCAGTCAA      |
| Circ-Herc3 (reverse)    | ACAAGGTGGTTCCTACGG      |
| U6 (forward)            | AACGCTTCACGAATTGCGT     |
| U6(reverse)             | GCTTCGGCAGCACATATACTAA  |
| Gprc5a (forward)        | TACAACTGCCCCTAGCGGT     |
| Gprc5a (reverse)        | TGAGGAAAACGAGTGCAAACAT  |
| hnRNPA1(forward)        | GAAACAACCGACGAGAGTCTG   |
| hnRNPA1 (reverse)       | TGTGTGGTCTTGCATTTCATGG  |
| TNF- $\alpha$ (forward) | CCCTCACACTCAGATCATCTTCT |
| TNF- $\alpha$ (reverse) | GCTACGACGTGGGCTACAG     |
| IL-6 (forward)          | TAGTCCTTCTACCCCAATTTC   |
| IL-6 (reverse)          | TTGGTCCTTAGCCACTCCTTC   |
| EZH2 (forward)          | AGTGACTTGGAATTTCCAGCAC  |
| EZH2 (reverse)          | AATTCTGTTGTAAGGGCGACC   |
| Hspa12a (forward)       | TCGGGGACACAGGAATAACAC   |
| Hspa12a (reverse)       | GGTAAAGCTGTAGGCATAGCC   |
| Cldn4 (forward)         | GTCCTGGGAATCTCCTTGGC    |
| Cldn4 (reverse)         | TCTGTGCCGTGACGATGTTG    |
| Eno3 (forward)          | CACAGCCAAGGGTCGATTCC    |
| Eno3 (reverse)          | CCCAGGTATCGTGCTTTGTCT   |
| Tmem146(forward)        | ACACACACAAGCATCTACTTTGA |

|                   |                         |
|-------------------|-------------------------|
| Tmem146 (reverse) | AGAGGACTGCACATTCACTGT   |
| Jun (forward)     | TGTGCCCCAAGAACGTGAC     |
| Jun (reverse)     | CCGGGTTGAAGTTGCTGAG     |
| Gp1bb (forward)   | TGACCGGCAACAACCTGAC     |
| Gp1bb (reverse)   | CAGCAGAGTAGACCGGGTG     |
| Elmo1 (forward)   | TGTAACCCACGATTTGCAGGA   |
| Elmo1 (reverse)   | TGCAGACATCCGTGAGTGTTT   |
| Tlco2 (forward)   | GCCTCTGGGATGGATGAGTCT   |
| Tlco2 (reverse)   | GCATGAGGATAAACGGGTAGGG  |
| Lama3 (forward)   | CTGTGACTACTGCAATTCTGAGG |
| Lama3 (reverse)   | CAAGGTGAGGTTGACTTGATTGT |
| 18S (forward)     | ACACGGACAGGATTGACAGA    |
| 18S (reverse)     | GGACATCTAAGGGCATCACA    |

**Supplementary Table S3. Sequences of circEZH2\_005 used for RNA pulldown analysis in the study**

| Gene name                                     | Sequences (5'-3')    |
|-----------------------------------------------|----------------------|
| mmu_circ_0001471(3bio)_ChIRP Probe_1          | GATTATTCTCCCTAGTCCCG |
| mmu_circ_0001471(3bio)_ChIRP Probe_2          | ATGATTATTCTCCCTAGTCC |
| mmu_circ_0001471(3bio)_ChIRP Probe_3          | CCATGATTATTCTCCCTAGT |
| mmu_circ_0001471(3bio)_Scramble<br>ChIRP NC_1 | CCTCGCAGTTGTTTACACCT |

**Supplementary Table S4. Si-RNAs were used in the study.**

| Gene name               | Sequence                |
|-------------------------|-------------------------|
| si-mmu_circ_0001471_001 | CGGGACTAGGGAGAATAAT     |
| si-mmu_circ_0001471_002 | GGACTAGGGAGAATAATCA     |
| si-mmu_circ_0001471_003 | CTAGGGAGAATAATCATGG     |
| si-hnRNPA1-1            | GGAUGGAAGAGUUGUGGAATT   |
| si-hnRNPA1-2            | GAGGGCUGAGCUUCGAAACAATT |
| si-hnRNPA1-3            | GAACAUCACCUACGAGAUUAUTT |
| si-Gprc5a-1             | UCACCUUCGCCUUCAUCAUCATT |
| si-Gprc5a-2             | CUGGAUCGUUCUGCUCCUGAUTT |
| si-Gprc5a-3             | CAGGACCAACGUCAAUGUCUUTT |
